# Supplementary material
Source: PubMed Central journal article supplement (PMC5817640)
Supplement: NIHMS924838-supplement-Supplementary_material_to_manuscript.pdf [file NIHMS924838-supplement-Supplementary_material_to_manuscript.pdf]

## Supplementary material to manuscript

# Rinsing paired-agent model (RPAM) to quantify cell-surface receptor concentrations in topical staining applications of thick tissues

Xiaochun Xu<sup>1</sup>, Yu Wang<sup>2</sup>, Jialing Xiang<sup>3</sup>, Jonathan T C Liu<sup>2</sup> and Kenneth M Tichauer<sup>1</sup>

<sup>1</sup>Department of Biomedical Engineering, Illinois Institute of Technology, Chicago, IL, 60616.

<sup>2</sup>Department of Mechanical Engineering, University of Washington, Seattle, WA, 98195.

<sup>3</sup>Department of Biology, Illinois Institute of Technology, Chicago, IL, 60616.

E-mail: [xxu9@hawk.iit.edu](mailto:xxu9@hawk.iit.edu)

### *I. Compartment modeling for imaging agent staining and rinsing of thick tissues*

Compartment modeling is a standard method to derive mathematical expressions that approximate the characteristics of imaging agent distribution in molecular imaging studies (Innis *et al.*, 2007). For 3D cell culture or thick tissue staining and rinsing, a three-compartment model can be used to model the distribution of a cell-surface receptor targeted imaging agent, with the three compartments including: 1) a “bound” compartment representing the concentration of imaging agent bound to the targeted receptor,  $C_b$ , 2) a “free” compartment representing the concentration of unbound agent in the medium,  $C_f$ , and 3) a “stain/rinse” compartment representing the concentration of the agent in the staining or rinsing solution,  $C_{sr}$  (**Fig. S1a**). A control (untargeted) imaging agent can be modeled similarly by two compartments, including only a “free” compartment,  $C_f'$ , and a “stain/rinse” compartment,  $C_{sr}'$  (**Fig. S1b**).

In general, imaging agents in any compartment are free to transfer to an adjacent compartment. The rate of transfer between compartments is assumed to follow first-order kinetics where the rate of change of concentration in any one compartment is directly proportional to a weighted sum of the concentrations in that compartment and the adjacent compartments. As such, the three- and two-compartment models characterizing targeted and control imaging agent

distributions, respectively, during staining or rinsing phase can be described by the following set of differential equations:

$$\begin{aligned}\frac{dC_f}{dt} &= k_{in}(t)C_{sr}(t) - k_{out}(t)C_f(t) - k_3C_f(t) + k_4C_b(t), \\ \frac{dC_b}{dt} &= k_3C_f(t) - k_4C_b(t), \\ \frac{dC_{sr}}{dt} &= -k_{in}(t)C_{sr}(t) + k_{out}(t)C_f(t),\end{aligned}\quad (S1)$$

$$\begin{aligned}\frac{dC'_f}{dt} &= k_{in}(t)C'_{sr}(t) - k_{out}(t)C'_f(t), \\ \frac{dC'_{sr}}{dt} &= -k_{in}(t)C'_{sr}(t) + k_{out}(t)C'_f(t),\end{aligned}$$

where  $k_{in}$ ,  $k_{out}$ ,  $k_3$ , and  $k_4$  are rate constants associated with the likelihood of diffusion of imaging agent from the rinsing/staining solution to the cell medium ( $k_{in}$ ), diffusion from the cell medium to the rinsing/staining solution ( $k_{out}$ ), binding to the targeted receptor ( $k_3$ ), and disassociation from the targeted receptor ( $k_4$ ), respectively. The system of differential equations in **Eq. (S1)** is directly adaptable for simulating the staining process, in addition to the rinsing process. For rinsing procedures, where  $t_r$  is the time the rinse is initiated,  $C_{sr}(t_r)$  and  $C'_{sr}(t_r) = 0$ , indicating no imaging agent in the rinsing solution. For staining procedures, where  $t_s$  is the time the stain is initiated,  $C_{sr}(t_s)$  and  $C'_{sr}(t_s) = C_0$ , where  $C_0$  is the concentration of imaging agent in the staining solution. Imaging is typically done without the staining solution or rinsing solution in contact with the medium. In this case,  $k_{in}$  and  $k_{out}$  are both set to zero in **Eq. (S1)**, which is why these rate constants are represented as functions of time in the equations. Under these conditions, the signal measured from the targeted ( $S_T$ ) and control ( $S_C$ ) imaging agents as a function of time,  $t$ , can be expressed as:

$$\begin{aligned}S_T(t) &= \eta_T [C_f(t) + C_b(t)], \\ S_C(t) &= \eta_C C'_f(t),\end{aligned}\quad (S2)$$

where  $\eta_T$  and  $\eta_C$  are constants relating the concentration to measured signal of targeted and control imaging agents, respectively, in the medium. The signals,  $S_T$  and  $S_C$ , are assumed to be in units proportional to fluorescence measured by the imaging system.

## II. Rinsing paired-agent model (RPAM) estimate of binding potential ( $BP_{RPAM}$ )

In standard fluorescence imaging systems, it is hard to monitor the concentration of the imaging agent in the staining or rinsing solution as a function of time, as would be necessary to solve the system in **Eqs. (S1)** and **(S2)**. As such, the staining/rinsing compartments  $C_{sr}$  and  $C'_{sr}$  were represented in terms of general functions,  $k_r(t)$  and  $k'_r(t)$ , as follows:

$$\begin{aligned} k_r(t) &= k_{out} - k_{in} \frac{C_{sr}(t)}{C_f(t)} && , \text{ for staining / rinsing,} \\ k_r(t) &= 0 && , \text{ for "imaging",} \end{aligned} \quad (S3)$$

$$\begin{aligned} k'_r(t) &= k_{out} - k_{in} \frac{C'_{sr}(t)}{C'_f(t)} && , \text{ for staining / rinsing,} \\ k'_r(t) &= 0 && , \text{ for "imaging",} \end{aligned}$$

where “imaging” refers to the time window of imaging when the medium is not in contact with either the staining or rinsing solutions. In general, a rinsing solution is chosen so that  $C_{sr} \ll C_f$  for all time points, and a staining solution is chosen so that  $C_{sr} = C'_{sr} \gg C_f, C'_f$ . Under these conditions, it can be assumed that  $k_r(t)$  is equivalent to  $k'_r(t)$ . Based on these assumptions, the system in **Eq. (S1)** can be simplified to:

$$\begin{aligned} \frac{dC_f}{dt} &= -k_r(t)C_f(t) - k_3C_f(t) + k_4C_b(t), \\ \frac{dC_b}{dt} &= k_3C_f(t) - k_4C_b(t), \end{aligned} \quad (S4)$$

$$\frac{dC'_f}{dt} = -k_r(t)C'_f(t)$$

The compartment models of targeted and control agents for RPAM are represented in **Figs. S1c** and **d**, respectively. Combination of the first two expressions in **Eq. (S4)** results in:

$$\begin{aligned} \frac{d(C_f + C_b)}{dt} &= -k_r(t)C_f(t), \\ \frac{dC'_f}{dt} &= -k_r(t)C'_f(t). \end{aligned} \quad (S5)$$

If the free and bound compartments are assumed to be in rapid equilibrium (adiabatic approximation) (Lammertsma and Hume, 1996), **Eq. S5** can be further simplified to:

$$C_f(t) \cong \frac{C_f(t) + C_b(t)}{1 + \frac{k_3}{k_4}}, \quad (S6)$$

where  $k_3/k_4$  is an important ratio in kinetic modeling of targeting imaging agents, referred to as the “binding potential” (*BP*) (Mintun *et al.*, 1984). *BP* can be shown to be equivalent to the product of the targeted receptor concentration and the affinity of the imaging agent for the receptor (Innis *et al.*, 2007). Since an imaging agent’s affinity is generally assumed to be constant, *BP* is often considered a direct estimate of the receptor concentration, which is the parameter of interest in most molecular imaging studies (Innis *et al.*, 2007).

Combining **Eqs (S2), (S5), and (S6)**, the system can be further simplified to:

$$\begin{aligned} \frac{dS_T(t)}{dt} &= -\frac{1}{1 + BP_{RPAM}} k_r(t) S_T(t), \\ \frac{dS_C(t)}{dt} &= -k_r(t) S_C(t) \end{aligned} \quad (S7)$$

**Eq. (S7)** can be tricky to solve, since  $k_r(t)$  is a function of  $S_T$  and  $S_C$ ; however, under rinsing conditions, when the  $C_{sr}/C_f$  terms can be considered small compared to the  $k_{out}$  term in **Eq. (S3)**, it is possible to approximate  $k_r(t)$  strictly as a function of  $t$  (demonstrated in simulations in this study). Solving these differential equations separately leads to:

$$\begin{aligned} S_T(t) &= S_T(t_i) e^{-\frac{1}{1+BP_{RPAM}} \int_0^t k_r(u) du}, \\ S_C(t) &= S_C(t_i) e^{-\int_0^t k_r(u) du}, \end{aligned} \quad (\text{S8})$$

which upon combination and further simplification can be expressed as:

$$\frac{S_T(t)}{S_T(t_i)} = \left( \frac{S_C(t)}{S_C(t_i)} \right)^{\frac{1}{1+BP_{RPAM}}}, \quad (\text{S9})$$

where a nonlinear least-squares fitting algorithm can be used to fit for  $BP$ , the estimate of which is referred to as the staining paired-agent model estimate of  $BP$ ,  $BP_{RPAM}$ , in this article. Alternatively, **Eq. (S9)** can be linearized as:

$$\ln \left[ \frac{S_C(t)}{S_C(t_i)} \right] = (BP_{RPAM} + 1) \ln \left[ \frac{S_T(t)}{S_T(t_i)} \right], \quad (\text{S10})$$

where the plotting of  $\ln(S_C(t)/S_C(t_i))$  vs.  $\ln(S_T(t)/S_T(t_i))$  would have a linear relationship with a slope equal to  $BP_{RPAM} + 1$ .

### III. Estimation of $k_{in}$ and $k_{out}$

The parameters,  $k_{in}$  and  $k_{out}$ , were tested through a series of staining and rinsing procedures on cell-free 3D matrix. Twelve wells (in 2, 6-well plates) containing 1-mL of 0.3% agarose gel were prepared using the same protocol as the “blank” well in the cell culture experiment. Background fluorescence images were taken for all wells.

Staining was carried out in 6 wells for durations of 1, 2, 3, 5, 10, and 20 min, followed by extraction of the staining solution and fluorescence imaging. Typical  $k_{in}$  and  $k_{out}$  values were then determined by fitting the following equations, through least squares optimization, to the measured fluorescence time-curves:

$$\begin{aligned} S_{Stain}(t) &= \frac{k_{in}}{k_{in} + k_{out}} S_{w0} - \frac{k_{in}}{k_{in} + k_{out}} S_{w0} e^{-(k_{in} + k_{out})t}, \\ S_{Rinse}(t) &= \frac{k_{in}}{k_{in} + k_{out}} S_{f0} + \frac{k_{out}}{k_{in} + k_{out}} S_{f0} e^{-(k_{in} + k_{out})t}, \end{aligned} \quad (\text{S11})$$

where the staining curve,  $S_{Stain}(t)$ , rinsing curve,  $S_{Rinse}(t)$ , initial dye signal,  $S_{w0}$ , and “zero-rinse” signal,  $S_{f0}$ , were imaged and measured for the targeted and control imaging agent, individually.

Six wells were stained with a 1 mL solution of 44-nM IRDye® 800CW EGF and 4-nM IRDye® 700DX NHS Ester solution (LICOR Biosciences) for a duration of 45 min. Staining solutions were extracted and pre-rinse fluorescence images were acquired. Each well was “rinsed” by adding 1 mL of Phosphate Buffered Saline solution for 1, 2, 3, 5, 10, and 20 min, at which time the rinsing solution was extracted, followed by final fluorescence imaging.

### IV. RPAM Evaluation Simulation

The full system of differential equations that characterizes staining and rinsing of topically applied imaging agents on thick tissue is expressed in **Eq. (S1)**. The staining time was set to be 45 minutes (time to reach equilibrium given experimental conditions). The effect of  $BP$ , rinsing time

and staining time (for dye removal and imaging procedures) on RPAM accuracy were evaluated separately. Time between repeated rinses was also evaluated; however, no effect was observed, so the results were left out the manuscript. Further analysis over a range of  $BP$  and rinsing time were evaluated. Given input values of  $k_{in}$ ,  $k_{out}$ ,  $k_3$ , and  $k_4$ , targeted and control imaging agent curves were simulated using numerical methods in the form of function `ode45()` in MATLAB (Mathworks, Natick, MA). The parameters  $k_{in}$  and  $k_{out}$  were estimated for 3D cell culture using the aforementioned experiments. Since the difference between estimated control and targeted  $k_{in}$  and  $k_{out}$  were close to each other (within the standard deviation), these numbers were kept the same in the simulation procedure. The parameter  $k_4$  was kept as a constant  $0.1 \text{ min}^{-1}$  obtained from past studies that explored the affinity between EGF and EGFR (Zhou *et al.*, 1993), and  $BP$  was set to change from 0.1 to 10 to evaluate a 2 orders-of-magnitude range typical of *in vivo* cell conditions.  $k_3$  were then calculated as:

$$k_3 = BP \times k_4. \quad (\text{S12})$$

0.1% Gaussian noise was applied to both curves (outputs from the numerical solution to **Eqs. S1**) separately to obtain fluorescence signal, and binding potential was evaluated using the Ratiometric, DPM-NS, and RPAM methods ( $BP_{Ratio}$ ,  $BP_{DPM-NS}$  and  $BP_{RPAM}$ ). This level of noise was similar to conservative estimates from experimental data and calculated as the ratio of the “energy” of random Gaussian noise to the “energy” of the signal – where “energy” of a signal refers to the area underneath the square of the signal over a set time interval.

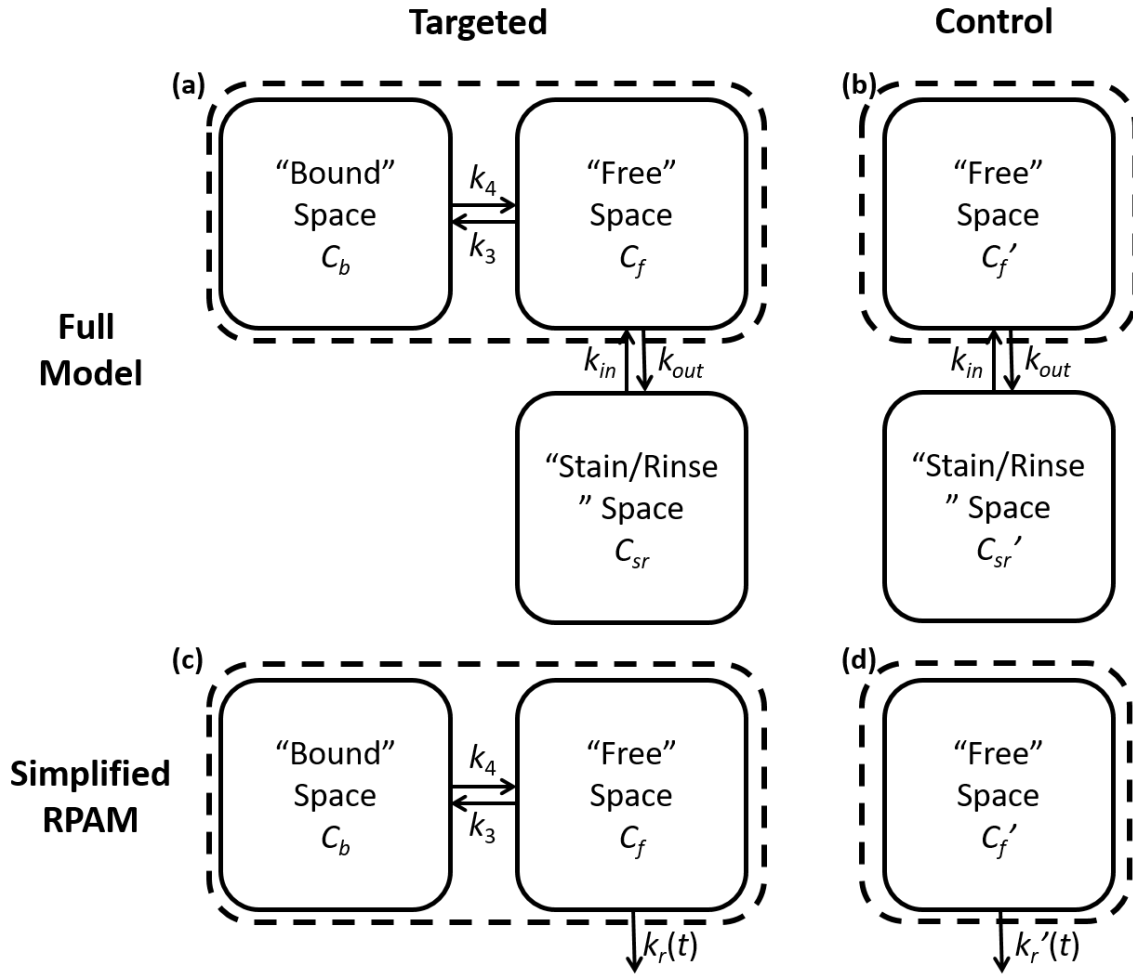

Figure S1. Illustration of the compartment models forming the foundation of the rinsing paired-agent model, RPAM. (a) A three-compartment model representing the distribution of the targeted imaging agent in “thick tissue,” between the stain/rinse compartment (staining or rinsing solution),  $C_{sr}$ , the “free” space (unbound agent in the tissue/medium),  $C_f$ , and the “bound” space (concentration of imaging agent bound to the targeted receptor),  $C_b$ . The rate constants  $k_{in}$ ,  $k_{out}$ ,  $k_3$ , and  $k_4$ , govern the rates of transport of the imaging agent from stain/rinse space to free space, free space to stain/rinse space, free space to bound space, and bound space to free space, respectively. (b) A two-compartment model representing the distribution of the control imaging agent in “thick tissue.” (c) A simplified two-compartment model that represents the RPAM for the targeted imaging agent. Here  $k_r(t)$  is a function replacing the mathematical contributions from  $k_{in}$ ,  $k_{out}$ , and the stain/rinse compartment. (d) A simplified one-compartment that represents the rinsing paired-agent model (RPAM) for the control imaging agent.

**Reference:**

- Innis R B, Cunningham V J, Delforge J, Fujita M, Gjedde A, Gunn R N, Holden J, Houle S, Huang S C, Ichise M, Iida H, Ito H, Kimura Y, Koeppe R A, Knudsen G M, Knuuti J, Lammertsma A A, Laruelle M, Logan J, Maguire R P, Mintun M A, Morris E D, Parsey R, Price J C, Slifstein M, Sossi V, Suhara T, Votaw J R, Wong D F and Carson R E 2007 Consensus nomenclature for in vivo imaging of reversibly binding radioligands *Journal of cerebral blood flow and metabolism : official journal of the International Society of Cerebral Blood Flow and Metabolism* **27** 1533-9
- Lammertsma A A and Hume S P 1996 Simplified reference tissue model for PET receptor studies *NeuroImage* **4** 153-8
- Mintun M A, Raichle M E, Kilbourn M R, Wooten G F and Welch M J 1984 A quantitative model for the in vivo assessment of drug binding sites with positron emission tomography *Annals of neurology* **15** 217-27
- Zhou M, Felder S, Rubinstein M, Hurwitz D R, Ullrich A, Lax I and Schlessinger J 1993 Real-time measurements of kinetics of EGF binding to soluble EGF receptor monomers and dimers support the dimerization model for receptor activation *Biochemistry* **32** 8193-8
